# Supplementary material
Source: PubMed Central journal article supplement (PMC4255409)
Supplement: CJN.10010913_CJN10010913SupplementaryData.pdf [file CJN.10010913_CJN10010913SupplementaryData.pdf]

**Supplemental Table 1.** Classification of clinical history of CVD (Panel A) and cause of new-onset CVD events (Panel B) in hemodialysis patients

**(A) Classification of clinical history of CVD**

| <b>Clinical history of CVD</b> | <b>No. events (%)</b> |
|--------------------------------|-----------------------|
| Angina pectoris                | 35 (26.5)             |
| Myocardial infarction          | 12 (9.1)              |
| Cerebral hemorrhage            | 10 (7.6)              |
| Cerebral infarction            | 44 (33.3)             |
| Arteriosclerosis obliterans    | 28 (21.2)             |
| Aortic disease                 | 3 (2.3)               |

Among 203 hemodialysis patients, 88 patients (43.3%) had 132 clinical history of CVD.

**(B) Cause of new-onset CVD events**

| <b>Causes of new-onset CVD events</b> | <b>No. patients (%)</b> |
|---------------------------------------|-------------------------|
| Heart failure                         | 10 (12.5)               |
| Sudden death                          | 8 (10.0)                |
| Myocardial infarction                 | 8 (10.0)                |
| Angina pectoris                       | 26 (32.5)               |
| Cerebral hemorrhage                   | 7 (8.8)                 |
| Cerebral infarction                   | 11 (13.8)               |
| Arteriosclerosis obliterans           | 9 (11.3)                |
| Aortic disease                        | 1 (1.3)                 |

Cardiovascular events were assessed after a median follow-up period of 48 months (range: 3-57, interquartile range: 23-55). During follow-up, 80 patients were hospitalized with a new-onset cardiovascular event.

**Supplemental Table 2.** Hazard ratios for telomeric G-tail length (A) and total telomere length (B) with cardiovascular events in 115 patients without CVD at baseline.

**(A) Telomeric G-tail length**

| Parameter                   | $\beta$ | <i>P</i> value |
|-----------------------------|---------|----------------|
| Age, per 1 year             | -0.09   | 0.23           |
| Gender, male                | -0.11   | 0.15           |
| Diabetes mellitus, presence | 0.01    | 0.86           |
| Phosphate, per 1 mg/dL      | 0.16    | 0.03           |
| Inflammation, presence      | 0.05    | 0.45           |

The adjusted  $r^2$  of the model was 0.06. Inflammation was defined as C-reactive protein > 0.5 mg/dL.  $\beta$  shows standard regression coefficient.

**(B) Total telomere length**

| Parameter                   | $\beta$ | <i>P</i> value |
|-----------------------------|---------|----------------|
| Age, per 1 year             | -0.27   | <0.01          |
| Gender, male                | -0.08   | 0.25           |
| Diabetes mellitus, presence | 0.02    | 0.79           |
| Phosphate, per 1 mg/dL      | 0.23    | <0.01          |
| Inflammation, presence      | 0.02    | 0.73           |

The adjusted  $r^2$  of the model was 0.15. Inflammation was defined as C-reactive protein > 0.5 mg/dL.  $\beta$  shows standard regression coefficient.
